# Supplementary material for: Source apportionment of atmospheric mercury in the remote marine atmosphere: Mace Head GAW station, Irish western coast
Source: Copernicus journal article supplement (doi:10.5194/acp-20-7929-2020), 2020-07-08
Supplement: Supplementary file 1 [file acp-20-7929-2020-supplement.pdf]

Supplement of Atmos. Chem. Phys., 20, 7929–7939, 2020  
<https://doi.org/10.5194/acp-20-7929-2020-supplement>  
© Author(s) 2020. This work is distributed under  
the Creative Commons Attribution 4.0 License.

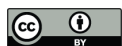

*Supplement of*

## **Source apportionment of atmospheric mercury in the remote marine atmosphere: Mace Head GAW station, Irish western coast**

**Danilo Custodio et al.**

*Correspondence to:* Danilo Custodio ([danilo.custodio@hzg.de](mailto:danilo.custodio@hzg.de))

The copyright of individual parts of the supplement might differ from the CC BY 4.0 License.

1  
2  
3

Supplement: Manuscript, “Source apportionment of atmospheric mercury in the remote marine atmosphere: Mace Head GAW station, Irish west coast”

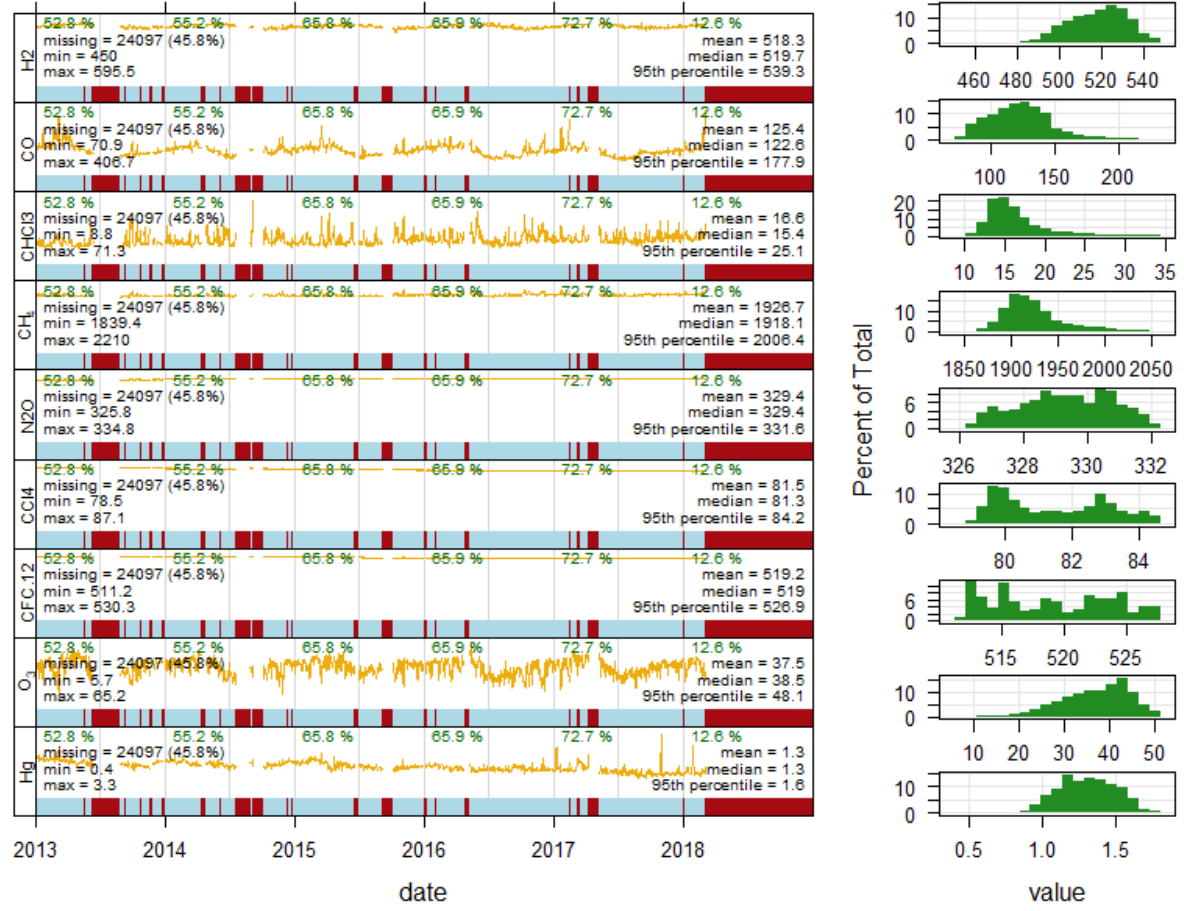

4  
5  
6  
7  
8  
9

Figure S1: Time plots of hourly average and concentration distribution of H<sub>2</sub>, CO, CHCl<sub>3</sub>, CH<sub>4</sub>, N<sub>2</sub>O, CCl<sub>4</sub>, CFC-12, O<sub>3</sub> and Hg, measured at Mace Head station from January 2013 to March 2018. \*Unity for the above mentioned species are ppb, ppb, ppt, ppb, ppb, ppt, ppt, ppt, ppb and ng m<sup>-3</sup> respectively.

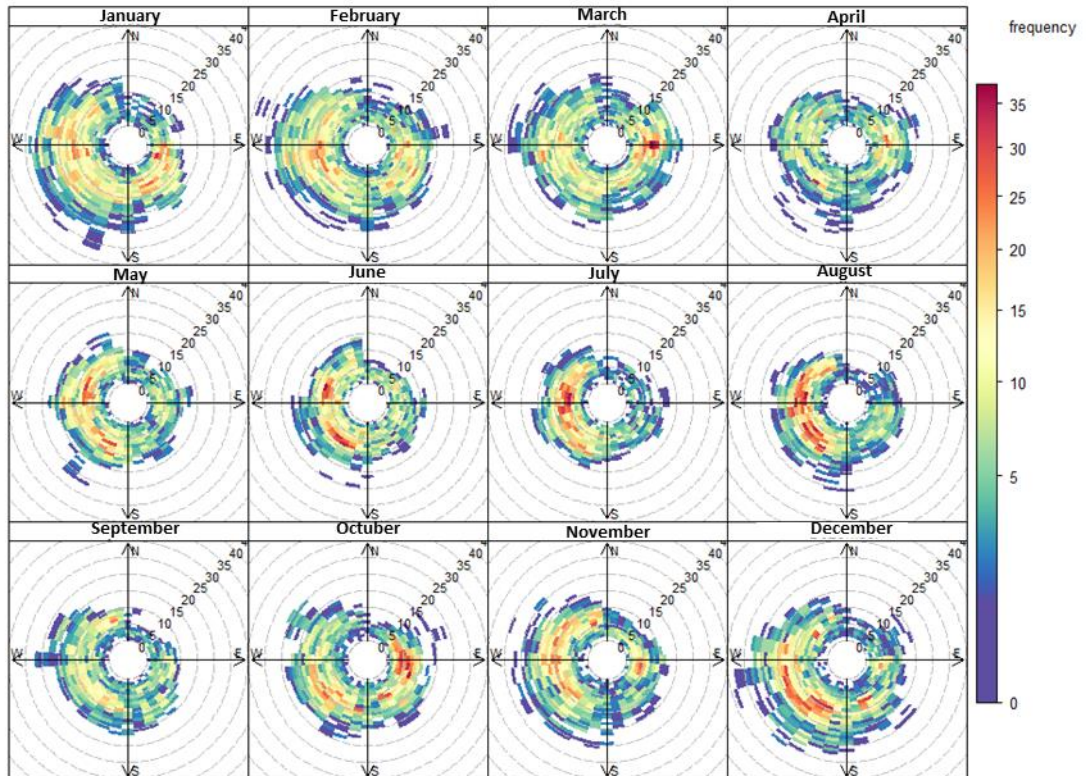

10  
11  
12  
13

Figure S2: Wind seasonality (speed and direction) at Mace Head from 2013 to 2018, showing stronger winds during winter (December to March) compared to summer (June to September).

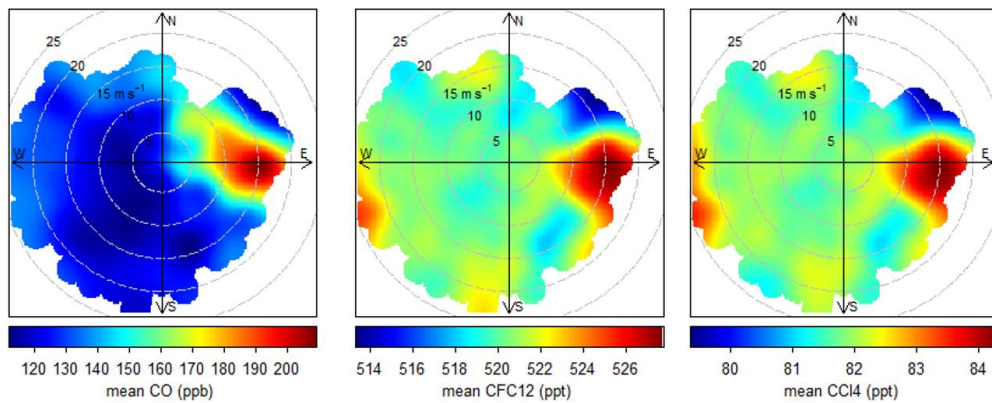

14  
15  
16

Figure S3: Polar plots for the CO, CFC<sub>12</sub> and CCl<sub>4</sub> concentration measured at Mace Head station from 2013 to February 2018 as a function of wind direction (°) and speed (ms<sup>-1</sup>).
